# Supplementary material for: Lipid Accumulation in Blastocystis Increases Cell Damage in Co-Cultured Cells
Source: MDPI journal article supplement (doi:10.3390/microorganisms11061582), 2023-06-14
Supplement: s1 [file s1]

## Supplementary Materials

(a)

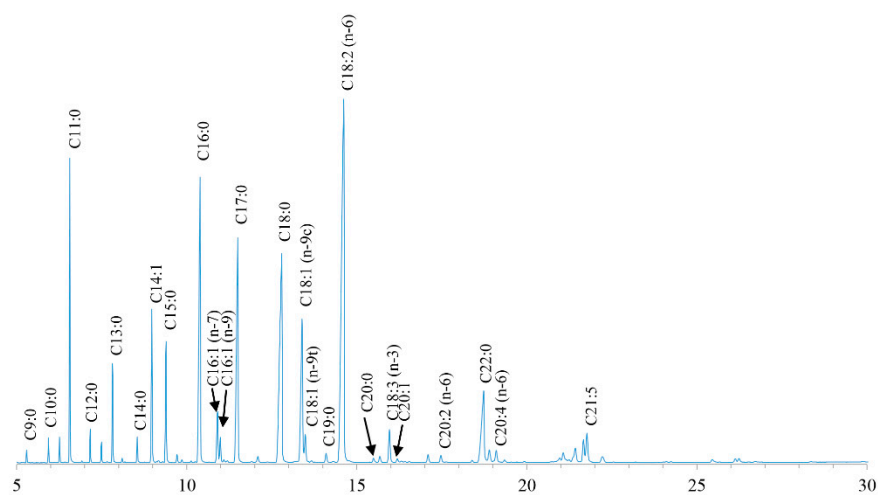

(b)

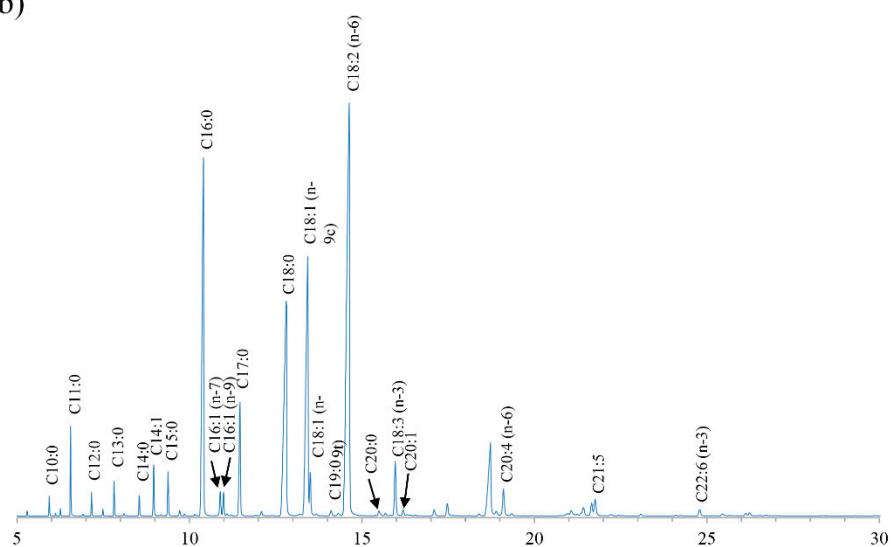

**Figure S1. The fatty acid components of (a) ST7-B and (b) LR ST7-B via GC-MS analysis.**

Table S1. The 25 genes of fatty acid synthesis pathway in *Blastocystis* ST7-B compared to different *protozoa*

| accession number | enzyme                                                         | <i>Blastocystis</i> ST-7 | <i>Amoeba</i> | <i>Cryptosporidium</i> | <i>Giardia lamblia</i> | <i>Plasmodium</i> | <i>Toxoplasma</i> | <i>Trichomonas vaginalis</i> | <i>Saccharomyces cerevisiae</i> |
|------------------|----------------------------------------------------------------|--------------------------|---------------|------------------------|------------------------|-------------------|-------------------|------------------------------|---------------------------------|
| CBK23200.2       | phosphoglucomutase                                             | 2.00E-180                | 3.00E-169     | 3.00E-04               | 9.00E-09               | 6.00E-156         | 1.00E-174         | 2.00E-131                    | 3.00E-179                       |
| CBK24660.2       | Glucokinase                                                    | 6.00E-24                 | N             | N                      | N                      | N                 | N                 | N                            | 1.00E-26                        |
| CBK23535.2       | Glucose-6-phosphate isomerase                                  | 0                        | 3.00E-158     | 5.00E-23               | 6.00E-152              | 2.00E-177         | 3.00E-124         | 2.00E-123                    | 0                               |
| CBK23558.2       | 6-phosphofructokinase 4                                        | 3.00E-100                | 3.00E-16      | 4.00E-13               | 3.00E-15               | 2.00E-15          | 8.00E-76          | 3.00E-10                     | 3.00E-114                       |
| CBK21536.2       | Fructose-bisphosphate aldolase                                 | 8.00E-121                | N             | 2.00E-13               | N                      | N                 | N                 | 8.00E-102                    | 5.00E-120                       |
| CBK20833.2       | Phosphoglycerate kinase                                        | 1.00E-122                | 7.00E-80      | 1.00E-77               | 6.00E-83               | 7.00E-95          | 3.00E-85          | 2.00E-80                     | 3.00E-121                       |
| CBK20416.2       | Glyceraldehyde-3-phosphate dehydrogenase                       | 8.00E-53                 | 9.00E-47      | 9.00E-49               | 7.00E-39               | 1.00E-43          | 3.00E-36          | 5.00E-42                     | 5.00E-52                        |
| CBK21549.2       | 2,3-bisphosphoglycerate-dependent phosphoglycerate mutase      | 3.00E-87                 | 6.00E-70      | 0.004                  | 9.00E-76               | 9.00E-77          | 8.00E-04          | 1.00E-61                     | 2.00E-96                        |
| CBK20528.2       | Enolase                                                        | 3.00E-157                | 3.00E-137     | 2.00E-106              | 3.00E-151              | 7.00E-141         | 5.00E-130         | 5.00E-139                    | 3.00E-164                       |
| CBK20192.2       | Pyruvate kinase                                                | 3.00E-114                | 7.00E-109     | 7.00E-41               | 2.00E-103              | 5.00E-116         | 2.00E-71          | 2.00E-77                     | 3.00E-128                       |
| CBK23410.2       | Pyruvate dehydrogenase E1 component subunit alpha type II      | 7.00E-75                 | N             | N                      | 2.00E-29               | 6.00E-38          | 3.00E-60          | 4.00E-75                     | 1.00E-180                       |
| CBK20363.2       | Pyruvate dehydrogenase                                         | 0.00E+00                 | 0.00E+00      | 0.00E+00               | 3.00E-11               | 8.00E-10          | 3.00E-45          | 1.00E-54                     | 0.00E+00                        |
| CBK22162.2       | Acetyl-CoA hydrolase                                           | 1.00E-175                | N             | N                      | N                      | N                 | N                 | 3.00E-163                    | 0                               |
| CBK22259.2       | Pyruvate Dehydrogenase E3 (dihydrolipoamide dehydrogenase)     | 1.00E-75                 | 2.00E-64      | 4.00E-38               | 9.00E-66               | 5.00E-66          | 5.00E-50          | 1.00E-59                     | 5.00E-126                       |
| CBK25054.2       | Pyruvate Dehydrogenase E2 (dihydrolipoamide acetyltransferase) | 4.00E-76                 | 5.00E-65      | 2.00E-38               | 1.00E-66               | 2.00E-66          | 3.00E-50          | 4.00E-60                     | 1.00E-126                       |
| CBK19839.2       | acetyl-CoA carboxylase                                         | 3.00E-43                 | 6.00E-11      | 9.00E-06               | 1.00E-08               | 6.00E-11          | 2.00E-07          | 2.00E-12                     | 3.00E-49                        |
| CBK23948.2       | Malonyl CoA-acyl carrier protein transacylase                  | 5.00E-19                 | 3.00E-07      | N                      | 2.00E-05               | 4.00E-08          | N                 | 0.004                        | 7.00E-21                        |
| CBK21675.2       | 3-oxoacyl-ACP synthase                                         | 4.00E-50                 | 5.00E-13      | N                      | 2.00E-43               | 4.00E-40          | 4.00E-42          | 3.00E-35                     | 3.00E-52                        |
| CBK22420.2       | 3-oxoacyl-ACP reductase                                        | 3.00E-07                 | N             | N                      | N                      | N                 | N                 | N                            | 1.00E-18                        |
| CBK21071.2       | Fatty acyl-CoA synthetase A                                    | 4.00E-95                 | 3.00E-76      | 3.00E-67               | 3.00E-81               | 2.00E-81          | 2.00E-72          | 1.00E-63                     | 4.00E-106                       |
| CBK24552.2       | Enoyl-[acyl-carrier-protein] reductase                         | 2.00E-33                 | 3.00E-21      | 7.00E-14               | 5.00E-12               | 3.00E-08          | 1.00E-12          | 5.00E-27                     | 9.00E-38                        |
| CBK22853.2       | Glycerol-3-phosphate dehydrogenase                             | 3.00E-87                 | 3.00E-64      | N                      | 1.00E-80               | 3.00E-85          | 4.00E-23          | 2.00E-76                     | 1.00E-94                        |
| CBK21536.2       | Fructose-bisphosphate aldolase class 2                         | 8.00E-121                | N             | 2.00E-13               | N                      | N                 | N                 | 8.00E-102                    | 5.00E-120                       |
| CBK22961.2       | Triosephosphate isomerase                                      | 2.00E-75                 | 8.00E-68      | 2.00E-59               | 2.00E-62               | 5.00E-71          | 1.00E-60          | 2.00E-65                     | 6.00E-78                        |
| CBK24352.2       | Glucose-6-phosphate 1-dehydrogenase, cytoplasmic isoform       | 6E-148                   | N             | 2.00E-58               | 3.00E-100              | 4.00E-121         | 1.00E-126         | 3.00E-121                    | 1.00E-146                       |

N=none detected
